# Supplementary material
Source: publisher figshare collection journal article supplement (https://plos.figshare.com/articles/dataset/_/1408055)
Supplement: Supplementary file [file 1]

**Table S5:** The 10 genes with smallest  $p$ -values identified using the asymptotic conditional test in cancer data. For each cancer type, we show the top 10 genes, their rank, and  $p$ -value using the exact permutational test, the asymptotic permutational test, the exact conditional test, and R `survdiff`. The number of samples with a mutation in the gene is also reported.

| cancer type | gene      | exact permutational |         | asyp. permutational |         | exact conditional |         | R <code>survdiff</code> |         | num. mut. |
|-------------|-----------|---------------------|---------|---------------------|---------|-------------------|---------|-------------------------|---------|-----------|
|             |           | rank                | $p$     | rank                | $p$     | rank              | $p$     | rank                    | $p$     |           |
| COADREAD    | VPS13B    | 3                   | 1.6e-03 | 9                   | 2.5e-04 | 1                 | 3.6e-04 | 1                       | 6.2e-12 | 8         |
|             | ZNF804B   | 7                   | 4.5e-03 | 23                  | 2.0e-03 | 5                 | 2.9e-03 | 2                       | 1.1e-10 | 5         |
|             | ERBB4     | 4                   | 1.6e-03 | 11                  | 2.9e-04 | 2                 | 5.9e-04 | 3                       | 2.2e-10 | 8         |
|             | AQPEP     | 9                   | 5.0e-03 | 24                  | 2.3e-03 | 6                 | 5.4e-03 | 4                       | 2.5e-08 | 5         |
|             | DOCK9     | 2                   | 1.0e-03 | 2                   | 4.6e-05 | 3                 | 1.7e-03 | 5                       | 4.3e-08 | 6         |
|             | DOCK3     | 6                   | 4.2e-03 | 3                   | 1.3e-04 | 8                 | 1.1e-02 | 6                       | 3.9e-06 | 3         |
|             | IGF1R     | 8                   | 4.8e-03 | 4                   | 1.5e-04 | 9                 | 1.3e-02 | 7                       | 8.9e-06 | 3         |
|             | ARAP1     | 38                  | 2.0e-02 | 60                  | 4.8e-02 | 34                | 4.7e-02 | 8                       | 1.0e-05 | 3         |
|             | PRKCB     | 47                  | 2.7e-02 | 59                  | 4.8e-02 | 35                | 4.7e-02 | 9                       | 1.0e-05 | 3         |
|             | PTPRM     | 1                   | 5.5e-04 | 1                   | 1.1e-05 | 4                 | 2.3e-03 | 10                      | 1.7e-05 | 8         |
| KIRC        | ARHGAP28  | 538                 | 2.6e-01 | 540                 | 2.6e-01 | 15                | 7.2e-03 | 1                       | 0<1e-16 | 3         |
|             | EZH2      | 46                  | 1.8e-02 | 54                  | 2.5e-02 | 4                 | 8.1e-04 | 2                       | 0<1e-16 | 3         |
|             | PRKG2     | 541                 | 2.6e-01 | 549                 | 2.6e-01 | 34                | 1.5e-02 | 3                       | 3.3e-16 | 3         |
|             | FBXO43    | 25                  | 1.1e-02 | 25                  | 1.1e-02 | 2                 | 2.5e-04 | 4                       | 4.4e-16 | 5         |
|             | ATP10D    | 2                   | 3.9e-04 | 3                   | 1.2e-03 | 3                 | 6.1e-04 | 5                       | 3.6e-12 | 3         |
|             | RASEF     | 47                  | 1.8e-02 | 64                  | 2.9e-02 | 7                 | 3.2e-03 | 6                       | 5.5e-11 | 3         |
|             | CDCA2     | 1                   | 2.8e-04 | 1                   | 2.8e-04 | 1                 | 1.8e-04 | 7                       | 6.2e-10 | 6         |
|             | PCDH11X   | 49                  | 1.8e-02 | 66                  | 3.0e-02 | 9                 | 4.2e-03 | 8                       | 1.0e-09 | 3         |
|             | ZFAT      | 51                  | 1.9e-02 | 68                  | 3.0e-02 | 10                | 4.6e-03 | 9                       | 2.6e-09 | 3         |
|             | TDRD7     | 3                   | 9.1e-04 | 4                   | 1.5e-03 | 5                 | 1.5e-03 | 10                      | 5.0e-09 | 3         |
| GBM         | HDAC9     | 53                  | 5.3e-02 | 57                  | 6.2e-02 | 3                 | 5.1e-03 | 1                       | 6.1e-06 | 3         |
|             | GRM7      | 61                  | 6.0e-02 | 64                  | 6.9e-02 | 6                 | 8.7e-03 | 2                       | 7.3e-05 | 3         |
|             | MYST3     | 63                  | 6.1e-02 | 65                  | 6.9e-02 | 7                 | 8.9e-03 | 3                       | 7.9e-05 | 3         |
|             | TBC1D2    | 32                  | 3.0e-02 | 32                  | 2.9e-02 | 1                 | 3.7e-03 | 4                       | 8.0e-05 | 5         |
|             | CASKIN2   | 42                  | 4.4e-02 | 42                  | 4.7e-02 | 5                 | 6.9e-03 | 5                       | 1.6e-04 | 4         |
|             | NFYC      | 71                  | 6.6e-02 | 73                  | 7.4e-02 | 10                | 1.2e-02 | 6                       | 2.0e-04 | 3         |
|             | ZNF618    | 69                  | 6.5e-02 | 74                  | 7.5e-02 | 11                | 1.2e-02 | 7                       | 2.3e-04 | 3         |
|             | ATP13A2   | 50                  | 5.0e-02 | 50                  | 5.5e-02 | 4                 | 6.4e-03 | 8                       | 3.7e-04 | 6         |
|             | LIMCH1    | 75                  | 6.9e-02 | 78                  | 7.7e-02 | 13                | 1.4e-02 | 9                       | 3.8e-04 | 3         |
|             | LMX1B     | 79                  | 7.1e-02 | 86                  | 8.0e-02 | 14                | 1.5e-02 | 10                      | 5.2e-04 | 3         |
| LUSC        | CHTF18    | 895                 | 1.1e-01 | 895                 | 1.1e-01 | 3                 | 5.2e-04 | 1                       | 0<1e-16 | 4         |
|             | RLTPR     | 628                 | 6.9e-02 | 636                 | 7.1e-02 | 8                 | 1.9e-03 | 2                       | 7.7e-14 | 3         |
|             | ZNF557    | 77                  | 4.3e-03 | 94                  | 7.7e-03 | 2                 | 4.1e-04 | 3                       | 2.0e-13 | 3         |
|             | CD33      | 659                 | 7.3e-02 | 663                 | 7.5e-02 | 13                | 3.7e-03 | 4                       | 3.9e-10 | 3         |
|             | SPATA22   | 678                 | 7.7e-02 | 677                 | 7.7e-02 | 20                | 5.1e-03 | 5                       | 9.9e-09 | 3         |
|             | SIN3B     | 109                 | 6.8e-03 | 126                 | 9.7e-03 | 6                 | 1.6e-03 | 6                       | 1.0e-08 | 3         |
|             | ANKRD11   | 424                 | 4.4e-02 | 427                 | 4.5e-02 | 7                 | 1.7e-03 | 7                       | 2.4e-08 | 5         |
|             | NARG2     | 115                 | 7.7e-03 | 137                 | 1.1e-02 | 9                 | 2.2e-03 | 8                       | 8.6e-08 | 3         |
|             | ZC3H12C   | 1020                | 1.3e-01 | 1018                | 1.3e-01 | 28                | 7.5e-03 | 9                       | 2.9e-07 | 4         |
|             | VN1R4     | 691                 | 7.9e-02 | 701                 | 8.1e-02 | 29                | 7.8e-03 | 10                      | 3.8e-07 | 3         |
| OV          | KIAA0913  | 81                  | 7.8e-02 | 81                  | 8.5e-02 | 2                 | 8.6e-03 | 1                       | 6.2e-05 | 4         |
|             | PABPC3    | 40                  | 2.8e-02 | 39                  | 2.9e-02 | 1                 | 6.0e-03 | 2                       | 1.0e-04 | 4         |
|             | NIPBL     | 115                 | 1.3e-01 | 114                 | 1.3e-01 | 3                 | 1.2e-02 | 3                       | 2.6e-04 | 5         |
|             | PCDHA9    | 46                  | 3.6e-02 | 46                  | 3.8e-02 | 4                 | 1.2e-02 | 4                       | 8.8e-04 | 4         |
|             | RBM44     | 90                  | 9.7e-02 | 91                  | 1.0e-01 | 6                 | 1.8e-02 | 5                       | 1.0e-03 | 4         |
|             | EFCAB6    | 125                 | 1.4e-01 | 127                 | 1.5e-01 | 9                 | 2.1e-02 | 6                       | 1.6e-03 | 5         |
|             | TNRC18B   | 56                  | 4.5e-02 | 55                  | 4.6e-02 | 7                 | 1.9e-02 | 7                       | 3.0e-03 | 4         |
|             | FARSA     | 104                 | 1.1e-01 | 105                 | 1.2e-01 | 15                | 2.9e-02 | 8                       | 3.8e-03 | 4         |
|             | PLEKHG1   | 103                 | 1.1e-01 | 107                 | 1.2e-01 | 16                | 2.9e-02 | 9                       | 4.0e-03 | 4         |
|             | PTCH1     | 66                  | 5.7e-02 | 65                  | 6.0e-02 | 8                 | 2.1e-02 | 10                      | 5.5e-03 | 6         |
| UCEC        | KLHL29    | 52                  | 1.5e-02 | 102                 | 3.2e-02 | 24                | 1.4e-02 | 1                       | 0<1e-16 | 3         |
|             | KRT6C     | 2                   | 7.0e-04 | 2                   | 2.3e-05 | 2                 | 1.0e-03 | 2                       | 0<1e-16 | 3         |
|             | LSS       | 3                   | 1.1e-03 | 3                   | 2.8e-05 | 3                 | 1.8e-03 | 3                       | 7.6e-14 | 3         |
|             | MYC       | 101                 | 2.7e-02 | 241                 | 6.5e-02 | 30                | 1.9e-02 | 4                       | 6.0e-13 | 4         |
|             | SH3GL1    | 54                  | 1.6e-02 | 103                 | 3.3e-02 | 31                | 1.9e-02 | 5                       | 6.0e-13 | 3         |
|             | CTGF      | 1                   | 9.6e-05 | 1                   | 8.3e-10 | 1                 | 5.2e-04 | 6                       | 3.7e-12 | 3         |
|             | TLR2      | 6                   | 3.3e-03 | 43                  | 1.2e-03 | 4                 | 3.0e-03 | 7                       | 3.7e-11 | 5         |
|             | EIF2C4    | 4                   | 2.0e-03 | 4                   | 3.7e-05 | 5                 | 4.0e-03 | 8                       | 9.6e-10 | 3         |
|             | LOC342346 | 63                  | 1.8e-02 | 109                 | 3.5e-02 | 45                | 2.8e-02 | 9                       | 5.3e-09 | 3         |
|             | RAB40AL   | 61                  | 1.7e-02 | 108                 | 3.5e-02 | 46                | 2.8e-02 | 10                      | 5.3e-09 | 3         |
