# Supplementary material
Source: publisher figshare collection journal article supplement (https://plos.figshare.com/articles/dataset/_/1408055)

End of iteration t

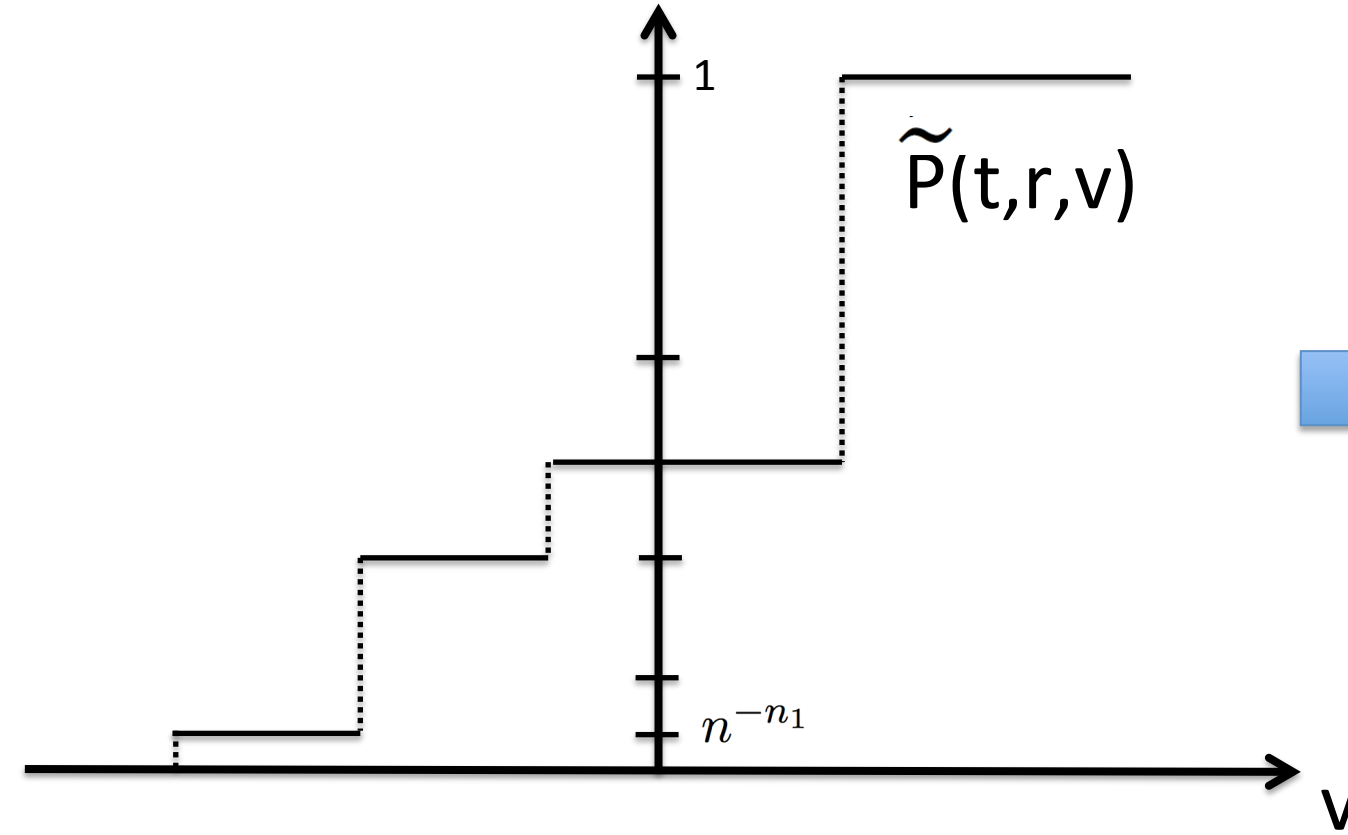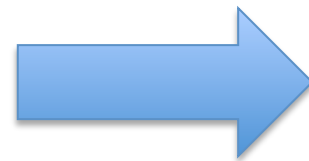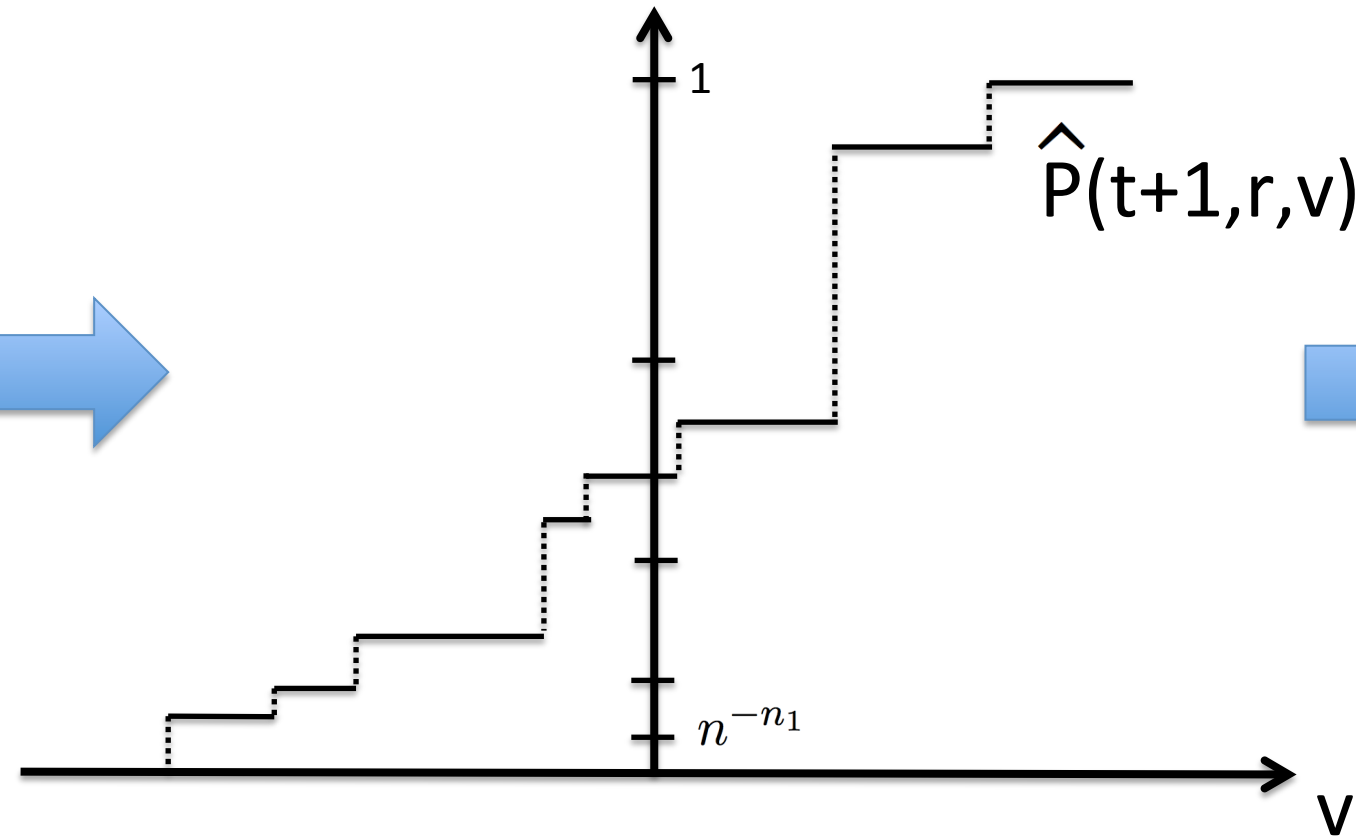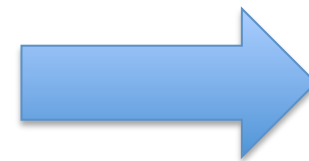

End of iteration t+1

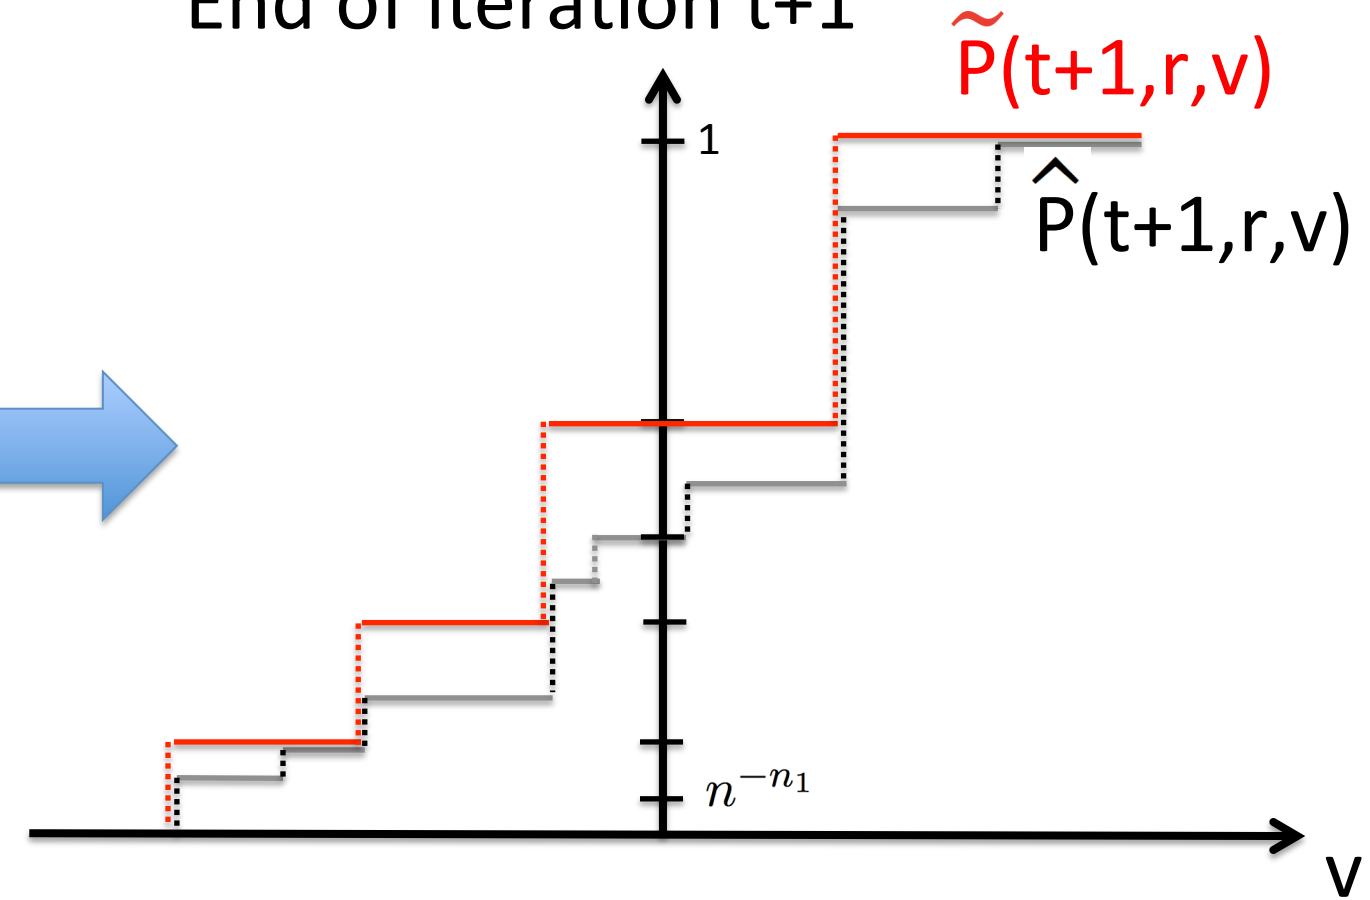

Supplement: Supplementary file [file 1]
