# Supplementary material
Source: publisher figshare collection journal article supplement (https://plos.figshare.com/articles/dataset/_/1408055)
Supplement: Supplementary file [file 1]

# SURVIVAL DATA

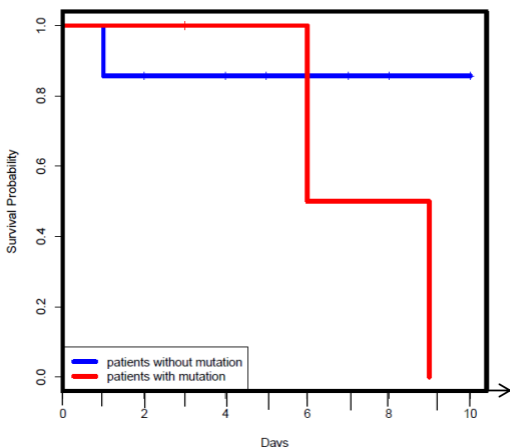

$$C = (1, 0, 0, 0, 0, 1, 0, 0, 1, 0)$$

$$X = (0, 0, 1, 0, 0, 1, 0, 0, 1, 0)$$

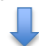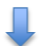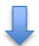

$$O_1=1$$

$$O_2=1$$

$$O_3=1$$

$$R_{1,0}=7$$

|             |   |
|-------------|---|
|             |   |
|             |   |
| $R_{1,1}=3$ | ? |

$$R_{2,0}=3$$

|             |   |
|-------------|---|
|             |   |
|             |   |
| $R_{2,1}=2$ | ? |

|  |   |
|--|---|
|  |   |
|  |   |
|  | ? |

$$R_{3,0}=1$$

$$R_{3,1}=1$$

Conditional Test

$$X^{(1)} = (0, \dots, \dots, \dots, 0, \dots, \dots, 1, \dots)$$

$$X^{(i)} = (1, \dots, \dots, \dots, 1, \dots, \dots, 0, \dots)$$

$$X^{(m)} = (1, \dots, \dots, \dots, 1, \dots, \dots, 1, \dots)$$

sample space

Permutational Test

$$X^{(1)} = (1, 1, 1, 0, 0, 0, 0, 0, 0, 0)$$

$$X^{(i)} = (0, 0, 1, 0, 0, 1, 0, 0, 1, 0)$$

$$X^{(m)} = (0, 0, 0, 0, 0, 0, 0, 1, 1, 1)$$

sample space
