# Supplementary material
Source: publisher figshare collection journal article supplement (https://plos.figshare.com/articles/dataset/_/1408055)
Supplement: Supplementary file [file 1]

**Table S1:** Parameters of the cancer datasets analyzed.

| dataset  | num. patients | % censoring | num. mut. genes | num. genes: 1% < mut. freq. < 10%. |
|----------|---------------|-------------|-----------------|------------------------------------|
| COADREAD | 188           | 92%         | 2716            | 1090                               |
| GBM      | 268           | 30%         | 3702            | 1686                               |
| KIRC     | 292           | 74%         | 4448            | 1873                               |
| LUSC     | 175           | 60%         | 8465            | 5646                               |
| OV       | 315           | 43%         | 3740            | 664                                |
| UCEC     | 235           | 93%         | 8304            | 5770                               |

For each dataset we show: the number of patients with both mutation and survival data; the percentage of patients with censored survival data; the number of (meta)genes mutated in at least one sample; the number of (meta)genes mutated in more than 1% and less than 10% of all samples.
