# Supplementary material
Source: publisher figshare collection journal article supplement (https://plos.figshare.com/articles/dataset/_/1408055)
Supplement: Supplementary file [file 1]

**Table S2:** The 10 genes with smallest  $p$ -values identified using the exact permutational test in cancer data. For each cancer type, we show the top 10 genes, their rank, and  $p$ -value using the exact permutational test, the asymptotic permutational test, the exact conditional test, and R `survdiff`. The number of samples with a mutation in the gene is also reported.

| cancer type | gene     | exact permutational |         | asyp. permutational |         | exact conditional |         | R <code>survdiff</code> |         | num. mut. |
|-------------|----------|---------------------|---------|---------------------|---------|-------------------|---------|-------------------------|---------|-----------|
|             |          | rank                | $p$     | rank                | $p$     | rank              | $p$     | rank                    | $p$     |           |
| COADREAD    | PTPRM    | 1                   | 5.5e-04 | 1                   | 1.1e-05 | 4                 | 2.3e-03 | 10                      | 1.7e-05 | 8         |
|             | DOCK9    | 2                   | 1.0e-03 | 2                   | 4.6e-05 | 3                 | 1.7e-03 | 5                       | 4.3e-08 | 6         |
|             | VPS13B   | 3                   | 1.6e-03 | 9                   | 2.5e-04 | 1                 | 3.6e-04 | 1                       | 6.2e-12 | 8         |
|             | ERBB4    | 4                   | 1.6e-03 | 11                  | 2.9e-04 | 2                 | 5.9e-04 | 3                       | 2.2e-10 | 8         |
|             | CACNA1E  | 5                   | 4.1e-03 | 12                  | 4.4e-04 | 7                 | 8.7e-03 | 21                      | 1.4e-04 | 7         |
|             | DOCK3    | 6                   | 4.2e-03 | 3                   | 1.3e-04 | 8                 | 1.1e-02 | 6                       | 3.9e-06 | 3         |
|             | ZNF804B  | 7                   | 4.5e-03 | 23                  | 2.0e-03 | 5                 | 2.9e-03 | 2                       | 1.1e-10 | 5         |
|             | IGF1R    | 8                   | 4.8e-03 | 4                   | 1.5e-04 | 9                 | 1.3e-02 | 7                       | 8.9e-06 | 3         |
|             | AQPEP    | 9                   | 5.0e-03 | 24                  | 2.3e-03 | 6                 | 5.4e-03 | 4                       | 2.5e-08 | 5         |
|             | ZNF568   | 10                  | 5.4e-03 | 5                   | 1.7e-04 | 10                | 1.5e-02 | 11                      | 2.5e-05 | 3         |
| KIRC        | CDCA2    | 1                   | 2.8e-04 | 1                   | 2.8e-04 | 1                 | 1.8e-04 | 7                       | 6.2e-10 | 6         |
|             | ATP10D   | 2                   | 3.9e-04 | 3                   | 1.2e-03 | 3                 | 6.1e-04 | 5                       | 3.6e-12 | 3         |
|             | TDRD7    | 3                   | 9.1e-04 | 4                   | 1.5e-03 | 5                 | 1.5e-03 | 10                      | 5.0e-09 | 3         |
|             | KIF27    | 4                   | 1.8e-03 | 2                   | 1.2e-03 | 13                | 6.2e-03 | 27                      | 1.2e-04 | 4         |
|             | TOPORS   | 5                   | 2.0e-03 | 6                   | 2.1e-03 | 8                 | 3.4e-03 | 14                      | 8.8e-07 | 3         |
|             | RELN     | 6                   | 2.5e-03 | 5                   | 1.8e-03 | 23                | 1.1e-02 | 44                      | 6.4e-04 | 4         |
|             | TCF20    | 7                   | 2.6e-03 | 7                   | 2.3e-03 | 17                | 8.4e-03 | 46                      | 7.2e-04 | 6         |
|             | CHD7     | 8                   | 3.2e-03 | 9                   | 3.2e-03 | 11                | 4.6e-03 | 30                      | 1.5e-04 | 7         |
|             | BCL9     | 9                   | 3.8e-03 | 8                   | 3.0e-03 | 16                | 7.6e-03 | 19                      | 3.7e-05 | 3         |
|             | PDE4C    | 10                  | 4.4e-03 | 10                  | 3.3e-03 | 20                | 9.1e-03 | 25                      | 7.9e-05 | 3         |
| GBM         | IDH1     | 1                   | 2.9e-04 | 2                   | 6.7e-05 | 2                 | 4.8e-03 | 27                      | 3.8e-03 | 15        |
|             | MED12L   | 2                   | 7.7e-04 | 1                   | 2.3e-05 | 8                 | 1.1e-02 | 62                      | 1.3e-02 | 3         |
|             | EMILIN1  | 3                   | 1.7e-03 | 3                   | 2.0e-04 | 45                | 3.2e-02 | 100                     | 3.2e-02 | 4         |
|             | ATP6V0A4 | 4                   | 1.9e-03 | 4                   | 2.5e-04 | 77                | 4.7e-02 | 101                     | 3.3e-02 | 4         |
|             | VARS2    | 5                   | 4.8e-03 | 5                   | 1.0e-03 | 64                | 4.1e-02 | 111                     | 3.8e-02 | 3         |
|             | GALR1    | 6                   | 5.5e-03 | 6                   | 1.3e-03 | 119               | 7.0e-02 | 156                     | 6.6e-02 | 3         |
|             | KCNH4    | 7                   | 7.1e-03 | 7                   | 2.0e-03 | 108               | 6.2e-02 | 125                     | 4.6e-02 | 3         |
|             | CXorf22  | 8                   | 7.1e-03 | 8                   | 4.3e-03 | 47                | 3.3e-02 | 102                     | 3.3e-02 | 8         |
|             | ITGAM    | 9                   | 9.1e-03 | 10                  | 5.3e-03 | 57                | 3.7e-02 | 109                     | 3.7e-02 | 6         |
|             | PLXNB3   | 10                  | 9.6e-03 | 12                  | 5.8e-03 | 99                | 5.6e-02 | 141                     | 5.7e-02 | 6         |
| LUSC        | ZNF304   | 1                   | 2.9e-05 | 2                   | 5.6e-05 | 37                | 9.1e-03 | 164                     | 1.1e-02 | 5         |
|             | ATXN10   | 2                   | 3.9e-05 | 1                   | 4.8e-05 | 117               | 3.2e-02 | 226                     | 2.4e-02 | 3         |
|             | LINGO1   | 3                   | 5.1e-05 | 4                   | 1.1e-04 | 80                | 2.1e-02 | 208                     | 1.9e-02 | 4         |
|             | C10orf79 | 4                   | 5.7e-05 | 3                   | 8.8e-05 | 16                | 4.8e-03 | 116                     | 4.9e-03 | 9         |
|             | SPANXN1  | 5                   | 7.6e-05 | 6                   | 1.5e-04 | 60                | 1.7e-02 | 188                     | 1.6e-02 | 5         |
|             | OR5AS1   | 6                   | 8.5e-05 | 5                   | 1.4e-04 | 31                | 8.2e-03 | 144                     | 8.6e-03 | 7         |
|             | SLC7A13  | 7                   | 1.3e-04 | 7                   | 2.2e-04 | 54                | 1.5e-02 | 201                     | 1.8e-02 | 5         |
|             | CCDC85A  | 8                   | 2.4e-04 | 8                   | 3.1e-04 | 25                | 7.0e-03 | 141                     | 8.0e-03 | 9         |
|             | CIT      | 9                   | 3.3e-04 | 11                  | 5.3e-04 | 128               | 3.5e-02 | 266                     | 3.0e-02 | 4         |
|             | DUSP27   | 10                  | 3.9e-04 | 9                   | 4.5e-04 | 14                | 3.9e-03 | 117                     | 4.9e-03 | 11        |
| OV          | DFNB31   | 1                   | 4.1e-04 | 1                   | 8.9e-05 | 5                 | 1.7e-02 | 18                      | 1.2e-02 | 4         |
|             | ERN2     | 2                   | 5.9e-04 | 2                   | 1.8e-04 | 13                | 2.6e-02 | 24                      | 2.2e-02 | 5         |
|             | NCOA3    | 3                   | 9.6e-04 | 3                   | 3.0e-04 | 11                | 2.5e-02 | 21                      | 1.8e-02 | 4         |
|             | CIC      | 4                   | 2.5e-03 | 4                   | 1.2e-03 | 18                | 3.1e-02 | 26                      | 2.5e-02 | 4         |
|             | PKP4     | 5                   | 3.4e-03 | 5                   | 2.1e-03 | 20                | 3.4e-02 | 31                      | 3.3e-02 | 5         |
|             | BRCA2    | 6                   | 4.0e-03 | 6                   | 3.0e-03 | 22                | 3.6e-02 | 32                      | 3.5e-02 | 9         |
|             | MYST4    | 7                   | 1.0e-02 | 10                  | 1.0e-02 | 74                | 9.9e-02 | 71                      | 8.0e-02 | 5         |
|             | CUBN     | 8                   | 1.1e-02 | 11                  | 1.0e-02 | 29                | 4.9e-02 | 35                      | 4.5e-02 | 6         |
|             | ADAR     | 9                   | 1.1e-02 | 8                   | 9.7e-03 | 68                | 9.6e-02 | 64                      | 7.1e-02 | 4         |
|             | PCDH9    | 10                  | 1.1e-02 | 9                   | 9.9e-03 | 73                | 9.8e-02 | 66                      | 7.4e-02 | 4         |
| UCEC        | CTGF     | 1                   | 9.6e-05 | 1                   | 8.3e-10 | 1                 | 5.2e-04 | 6                       | 3.7e-12 | 3         |
|             | KRT6C    | 2                   | 7.0e-04 | 2                   | 2.3e-05 | 2                 | 1.0e-03 | 2                       | <1e-16  | 3         |
|             | LSS      | 3                   | 1.1e-03 | 3                   | 2.8e-05 | 3                 | 1.8e-03 | 3                       | 7.6e-14 | 3         |
|             | EIF2C4   | 4                   | 2.0e-03 | 4                   | 3.7e-05 | 5                 | 4.0e-03 | 8                       | 9.6e-10 | 3         |
|             | CPNE8    | 5                   | 2.4e-03 | 5                   | 4.0e-05 | 6                 | 4.8e-03 | 13                      | 6.0e-09 | 3         |
|             | TLR2     | 6                   | 3.3e-03 | 43                  | 1.2e-03 | 4                 | 3.0e-03 | 7                       | 3.7e-11 | 5         |
|             | USP20    | 7                   | 3.6e-03 | 6                   | 5.3e-05 | 10                | 7.7e-03 | 19                      | 3.6e-07 | 3         |
|             | RBM5     | 8                   | 3.6e-03 | 7                   | 5.3e-05 | 11                | 7.7e-03 | 20                      | 3.7e-07 | 3         |
|             | SLC22A11 | 9                   | 3.6e-03 | 8                   | 5.4e-05 | 12                | 7.9e-03 | 21                      | 4.2e-07 | 3         |
|             | HGF      | 10                  | 3.7e-03 | 10                  | 5.5e-05 | 14                | 8.3e-03 | 23                      | 5.8e-07 | 3         |
