# Supplementary material
Source: publisher figshare collection journal article supplement (https://plos.figshare.com/articles/dataset/_/1408055)
Supplement: Supplementary file [file 1]

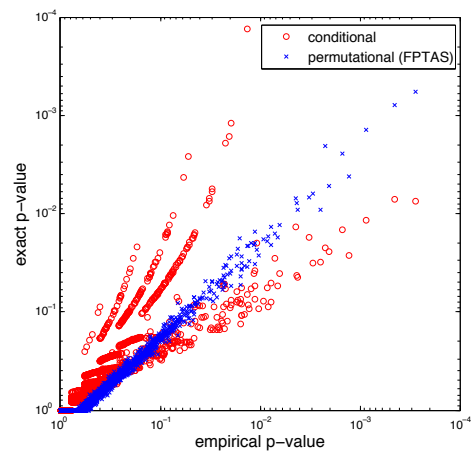

(a)

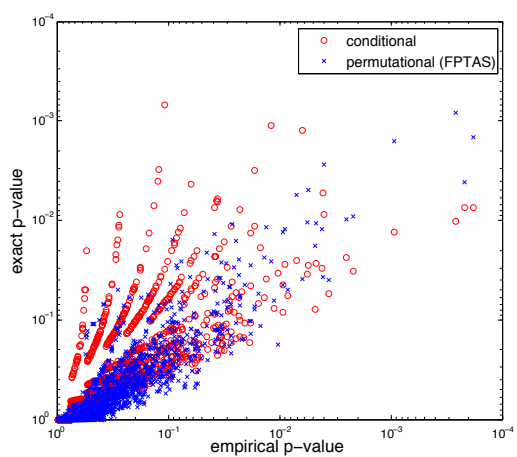

(b)
