# Supplementary material
Source: publisher figshare collection journal article supplement (https://plos.figshare.com/articles/dataset/_/1408055)
Supplement: Supplementary file [file 1]

**Table S4:** The 10 genes with smallest  $p$ -values identified using the exact conditional test in cancer data. For each cancer type, we show the top 10 genes, their rank, and  $p$ -value using the exact permutational test, the asymptotic permutational test, the exact conditional test, and  $R_{\text{survdiff}}$ . The number of samples with a mutation in the gene is also reported.

| cancer type | gene     | exact permutational |         | asyp. permutational |         | exact conditional |         | R <sub>survdiff</sub> |          | num. mut. |
|-------------|----------|---------------------|---------|---------------------|---------|-------------------|---------|-----------------------|----------|-----------|
|             |          | rank                | $p$     | rank                | $p$     | rank              | $p$     | rank                  | $p$      |           |
| COADREAD    | VPS13B   | 3                   | 1.6e-03 | 9                   | 2.5e-04 | 1                 | 3.6e-04 | 1                     | 6.2e-12  | 8         |
|             | ERBB4    | 4                   | 1.6e-03 | 11                  | 2.9e-04 | 2                 | 5.9e-04 | 3                     | 2.2e-10  | 8         |
|             | DOCK9    | 2                   | 1.0e-03 | 2                   | 4.6e-05 | 3                 | 1.7e-03 | 5                     | 4.3e-08  | 6         |
|             | PTPRM    | 1                   | 5.5e-04 | 1                   | 1.1e-05 | 4                 | 2.3e-03 | 10                    | 1.7e-05  | 8         |
|             | ZNF804B  | 7                   | 4.5e-03 | 23                  | 2.0e-03 | 5                 | 2.9e-03 | 2                     | 1.1e-10  | 5         |
|             | AQPEP    | 9                   | 5.0e-03 | 24                  | 2.3e-03 | 6                 | 5.4e-03 | 4                     | 2.5e-08  | 5         |
|             | CACNA1E  | 5                   | 4.1e-03 | 12                  | 4.4e-04 | 7                 | 8.7e-03 | 21                    | 1.4e-04  | 7         |
|             | DOCK3    | 6                   | 4.2e-03 | 3                   | 1.3e-04 | 8                 | 1.1e-02 | 6                     | 3.9e-06  | 3         |
|             | IGF1R    | 8                   | 4.8e-03 | 4                   | 1.5e-04 | 9                 | 1.3e-02 | 7                     | 8.9e-06  | 3         |
|             | ZNF568   | 10                  | 5.4e-03 | 5                   | 1.7e-04 | 10                | 1.5e-02 | 11                    | 2.5e-05  | 3         |
| KIRC        | CDCA2    | 1                   | 2.8e-04 | 1                   | 2.8e-04 | 1                 | 1.8e-04 | 7                     | 6.2e-10  | 6         |
|             | FBXO43   | 25                  | 1.1e-02 | 25                  | 1.1e-02 | 2                 | 2.5e-04 | 4                     | 4.4e-16  | 5         |
|             | ATP10D   | 2                   | 3.9e-04 | 3                   | 1.2e-03 | 3                 | 6.1e-04 | 5                     | 3.6e-12  | 3         |
|             | EZH2     | 46                  | 1.8e-02 | 54                  | 2.5e-02 | 4                 | 8.1e-04 | 2                     | <1.0e-16 | 3         |
|             | TDRD7    | 3                   | 9.1e-04 | 4                   | 1.5e-03 | 5                 | 1.5e-03 | 10                    | 5.0e-09  | 3         |
|             | PKD1L3   | 36                  | 1.4e-02 | 36                  | 1.6e-02 | 6                 | 3.2e-03 | 13                    | 6.5e-07  | 5         |
|             | RASEF    | 47                  | 1.8e-02 | 64                  | 2.9e-02 | 7                 | 3.2e-03 | 6                     | 5.5e-11  | 3         |
|             | TOPORS   | 5                   | 2.0e-03 | 6                   | 2.1e-03 | 8                 | 3.4e-03 | 14                    | 8.8e-07  | 3         |
|             | PCDH11X  | 49                  | 1.8e-02 | 66                  | 3.0e-02 | 9                 | 4.2e-03 | 8                     | 1.0e-09  | 3         |
|             | ZFAT     | 51                  | 1.9e-02 | 68                  | 3.0e-02 | 10                | 4.6e-03 | 9                     | 2.6e-09  | 3         |
| GBM         | TBC1D2   | 32                  | 3.0e-02 | 32                  | 2.9e-02 | 1                 | 3.7e-03 | 4                     | 8.0e-05  | 5         |
|             | IDH1     | 1                   | 2.9e-04 | 2                   | 6.7e-05 | 2                 | 4.8e-03 | 27                    | 3.8e-03  | 15        |
|             | HDAC9    | 53                  | 5.3e-02 | 57                  | 6.2e-02 | 3                 | 5.1e-03 | 1                     | 6.1e-06  | 3         |
|             | ATP13A2  | 50                  | 5.0e-02 | 50                  | 5.5e-02 | 4                 | 6.4e-03 | 8                     | 3.7e-04  | 6         |
|             | CASKIN2  | 42                  | 4.4e-02 | 42                  | 4.7e-02 | 5                 | 6.9e-03 | 5                     | 1.6e-04  | 4         |
|             | GRM7     | 61                  | 6.0e-02 | 64                  | 6.9e-02 | 6                 | 8.7e-03 | 2                     | 7.3e-05  | 3         |
|             | MYST3    | 63                  | 6.1e-02 | 65                  | 6.9e-02 | 7                 | 8.9e-03 | 3                     | 7.9e-05  | 3         |
|             | MED12L   | 2                   | 7.7e-04 | 1                   | 2.3e-05 | 8                 | 1.1e-02 | 62                    | 1.3e-02  | 3         |
|             | BID      | 51                  | 5.2e-02 | 51                  | 5.5e-02 | 9                 | 1.1e-02 | 12                    | 7.1e-04  | 4         |
|             | NFYC     | 71                  | 6.6e-02 | 73                  | 7.4e-02 | 10                | 1.2e-02 | 6                     | 2.0e-04  | 3         |
| LUSC        | ZNF527   | 11                  | 4.0e-04 | 10                  | 5.0e-04 | 1                 | 2.1e-04 | 12                    | 6.0e-07  | 9         |
|             | ZNF557   | 77                  | 4.3e-03 | 94                  | 7.7e-03 | 2                 | 4.1e-04 | 3                     | 2.0e-13  | 3         |
|             | CHTF18   | 895                 | 1.1e-01 | 895                 | 1.1e-01 | 3                 | 5.2e-04 | 1                     | 0<1e-16  | 4         |
|             | CNGA4    | 37                  | 1.7e-03 | 33                  | 2.2e-03 | 4                 | 1.2e-03 | 14                    | 2.3e-06  | 5         |
|             | BCL11A   | 304                 | 2.9e-02 | 302                 | 3.0e-02 | 5                 | 1.3e-03 | 11                    | 5.8e-07  | 7         |
|             | SIN3B    | 109                 | 6.8e-03 | 126                 | 9.7e-03 | 6                 | 1.6e-03 | 6                     | 1.0e-08  | 3         |
|             | ANKRD11  | 424                 | 4.4e-02 | 427                 | 4.5e-02 | 7                 | 1.7e-03 | 7                     | 2.4e-08  | 5         |
|             | RLTPR    | 628                 | 6.9e-02 | 636                 | 7.1e-02 | 8                 | 1.9e-03 | 2                     | 7.7e-14  | 3         |
|             | NARG2    | 115                 | 7.7e-03 | 137                 | 1.1e-02 | 9                 | 2.2e-03 | 8                     | 8.6e-08  | 3         |
|             | ATP2B2   | 149                 | 1.1e-02 | 148                 | 1.2e-02 | 10                | 2.4e-03 | 23                    | 2.3e-05  | 7         |
| OV          | PABPC3   | 40                  | 2.8e-02 | 39                  | 2.9e-02 | 1                 | 6.0e-03 | 2                     | 1.0e-04  | 4         |
|             | KIAA0913 | 81                  | 7.8e-02 | 81                  | 8.5e-02 | 2                 | 8.6e-03 | 1                     | 6.2e-05  | 4         |
|             | NIPBL    | 115                 | 1.3e-01 | 114                 | 1.3e-01 | 3                 | 1.2e-02 | 3                     | 2.6e-04  | 5         |
|             | PCDHA9   | 46                  | 3.6e-02 | 46                  | 3.8e-02 | 4                 | 1.2e-02 | 4                     | 8.8e-04  | 4         |
|             | DFNB31   | 1                   | 4.1e-04 | 1                   | 8.9e-05 | 5                 | 1.7e-02 | 18                    | 1.2e-02  | 4         |
|             | RBM44    | 90                  | 9.7e-02 | 91                  | 1.0e-01 | 6                 | 1.8e-02 | 5                     | 1.0e-03  | 4         |
|             | TNRC18B  | 56                  | 4.5e-02 | 55                  | 4.6e-02 | 7                 | 1.9e-02 | 7                     | 3.0e-03  | 4         |
|             | PTCH1    | 66                  | 5.7e-02 | 65                  | 6.0e-02 | 8                 | 2.1e-02 | 10                    | 5.5e-03  | 6         |
|             | EFCAB6   | 125                 | 1.4e-01 | 127                 | 1.5e-01 | 9                 | 2.1e-02 | 6                     | 1.6e-03  | 5         |
|             | PCDH15   | 51                  | 4.0e-02 | 50                  | 4.2e-02 | 10                | 2.2e-02 | 12                    | 6.6e-03  | 5         |
| UCEC        | CTGF     | 1                   | 9.6e-05 | 1                   | 8.3e-10 | 1                 | 5.2e-04 | 6                     | 3.7e-12  | 3         |
|             | KRT6C    | 2                   | 7.0e-04 | 2                   | 2.3e-05 | 2                 | 1.0e-03 | 2                     | 0<1e-16  | 3         |
|             | LSS      | 3                   | 1.1e-03 | 3                   | 2.8e-05 | 3                 | 1.8e-03 | 3                     | 7.6e-14  | 3         |
|             | TLR2     | 6                   | 3.3e-03 | 43                  | 1.2e-03 | 4                 | 3.0e-03 | 7                     | 3.7e-11  | 5         |
|             | EIF2C4   | 4                   | 2.0e-03 | 4                   | 3.7e-05 | 5                 | 4.0e-03 | 8                     | 9.6e-10  | 3         |
|             | CPNE8    | 5                   | 2.4e-03 | 5                   | 4.0e-05 | 6                 | 4.8e-03 | 13                    | 6.0e-09  | 3         |
|             | CFP      | 15                  | 4.1e-03 | 46                  | 1.5e-03 | 7                 | 5.4e-03 | 14                    | 2.8e-08  | 5         |
|             | TUT1     | 16                  | 4.1e-03 | 47                  | 1.5e-03 | 8                 | 5.6e-03 | 15                    | 4.1e-08  | 5         |
|             | SH3TC2   | 13                  | 3.8e-03 | 29                  | 4.4e-04 | 9                 | 7.4e-03 | 18                    | 2.3e-07  | 4         |
|             | USP20    | 7                   | 3.6e-03 | 6                   | 5.3e-05 | 10                | 7.7e-03 | 19                    | 3.6e-07  | 3         |
